# Supplementary material
Source: PubMed Central journal article supplement (PMC3337676)
Supplement: NIHMS369854-supplement-supplement_1.pdf [file NIHMS369854-supplement-supplement_1.pdf]

Supplementary Table 1. Effect modification by hypertension on the associations of selected NOS3 polymorphisms and primary open-angle glaucoma\*

|                              |          | Women                        |                                |                             | Men                          |                                |                             | Pooled All POAG                |                             | Pooled High Tension POAG       |                             | Pooled Normal Tension POAG     |                             |
|------------------------------|----------|------------------------------|--------------------------------|-----------------------------|------------------------------|--------------------------------|-----------------------------|--------------------------------|-----------------------------|--------------------------------|-----------------------------|--------------------------------|-----------------------------|
| SNP                          | Genotype | Number of Cases (HTN-/HTN+)* | No hypertension<br>RR (95% CI) | Hypertension<br>RR (95% CI) | Number of Cases (HTN-/HTN+)* | No hypertension<br>RR (95% CI) | Hypertension<br>RR (95% CI) | No hypertension<br>RR (95% CI) | Hypertension<br>RR (95% CI) | No hypertension<br>RR (95% CI) | Hypertension<br>RR (95% CI) | No hypertension<br>RR (95% CI) | Hypertension<br>RR (95% CI) |
| Promoter -786C/T             | TT       | 73/64                        | 1.00                           | 1.43<br>(0.93, 2.21)        | 38/27                        | 1.00                           | 1.67<br>(0.86, 3.26)        | 1.00                           | 1.50<br>(1.04, 2.16)        | 1.00                           | 1.71<br>(1.08, 2.70)        | 1.00                           | 1.71<br>(0.85, 3.43)        |
|                              | TC       | 112/54                       | 1.45<br>(1.00, 2.10)           | 1.06<br>(0.68, 1.67)        | 32/34                        | 0.89<br>(0.50, 1.58)           | 1.73<br>(0.94, 3.18)        | 1.20<br>(0.75, 1.91)           | 1.30<br>(0.81, 2.07)        | 1.47<br>(1.00, 2.16)           | 1.24<br>(0.76, 2.03)        | 0.66<br>(0.14, 3.17)           | 1.24<br>(0.61, 2.49)        |
|                              | CC       | 42/20                        | 1.53<br>(0.95, 2.45)           | 1.18<br>(0.64, 2.18)        | 19/ 3                        | 1.29<br>(0.62, 2.68)           | 0.24<br>(0.06, 0.95)        | 1.45<br>(0.97, 2.16)           | 0.60<br>(0.13, 2.82)        | 2.18<br>(1.34, 3.56)           | 0.84<br>(0.09, 7.90)        | 0.58<br>(0.23, 1.45)           | 0.41<br>(0.13, 1.27)        |
|                              |          |                              |                                |                             |                              |                                |                             |                                | <b>P-interaction =0.007</b> |                                | P-interaction =0.04         |                                | P-interaction =0.22         |
| <i>Glu298Asp</i> (rs1799983) | GG       | 97/67                        | 1.00                           | 1.14<br>(0.75, 1.72)        | 37/35                        | 1.00                           | 1.96<br>(1.06, 3.60)        | 1.00                           | 1.42<br>(0.84, 2.40)        | 1.00                           | 1.48<br>(0.86, 2.54)        | 1.00                           | 1.25<br>(0.65, 2.42)        |
|                              | GT       | 97/46                        | 1.17<br>(0.81, 1.67)           | 0.89<br>(0.57, 1.40)        | 36/24                        | 1.33<br>(0.74, 2.38)           | 2.03<br>(1.04, 3.96)        | 1.21<br>(0.89, 1.64)           | 1.29<br>(0.58, 2.88)        | 1.29<br>(0.88, 1.89)           | 1.17<br>(0.73, 1.88)        | 1.00<br>(0.40, 2.46)           | 1.76<br>(0.37, 8.27)        |
|                              | TT       | 35/21                        | 1.55<br>(0.95, 2.53)           | 1.56<br>(0.82, 2.99)        | 11/ 4                        | 1.38<br>(0.61, 3.12)           | 0.94<br>(0.25, 3.56)        | 1.50<br>(0.99, 2.29)           | 1.42<br>(0.79, 2.54)        | 1.67<br>(1.00, 2.79)           | 1.25<br>(0.57, 2.72)        | 1.75<br>(0.71, 4.30)           | 2.26<br>(0.77, 6.67)        |
|                              |          |                              |                                |                             |                              |                                |                             |                                | <b>P-interaction =0.18</b>  |                                | P-interaction =0.09         |                                | P-interaction =0.92         |
| rs3918188                    | CC       | 114/59                       | 1.00                           | 0.94<br>(0.62, 1.42)        | 42/27                        | 1.00                           | 1.40<br>(0.73, 2.69)        | 1.00                           | 1.05<br>(0.74, 1.50)        | 1.00                           | 0.94<br>(0.60, 1.46)        | 1.00                           | 2.65<br>(0.25, 28.24)       |
|                              | CA       | 93/64                        | 0.75<br>(0.53, 1.06)           | 0.79<br>(0.53, 1.17)        | 28/25                        | 0.63<br>(0.35, 1.13)           | 0.91<br>(0.48, 1.72)        | 0.72<br>(0.53, 0.96)           | 0.82<br>(0.58, 1.15)        | 0.56<br>(0.38, 0.81)           | 0.63<br>(0.41, 0.96)        | 1.16<br>(0.65, 2.06)           | 1.78<br>(0.86, 3.68)        |
|                              | AA       | 24/17                        | 0.71<br>(0.41, 1.21)           | 0.59<br>(0.31, 1.13)        | 20/12                        | 1.42<br>(0.69, 2.94)           | 2.28<br>(0.93, 5.59)        | 0.96<br>(0.49, 1.89)           | 1.12<br>(0.30, 4.18)        | 0.63<br>(0.37, 1.08)           | 0.99<br>(0.15, 6.61)        | 2.23<br>(0.60, 8.24)           | 1.08<br>(0.39, 2.98)        |
|                              |          |                              |                                |                             |                              |                                |                             |                                | <b>P-interaction =0.95</b>  |                                | P-interaction =0.56         |                                | P-interaction =0.40         |
| rs7830                       | CC       | 106/66                       | 1.00                           | 0.84<br>(0.56, 1.26)        | 44/21                        | 1.00                           | 0.76<br>(0.40, 1.45)        | 1.00                           | 0.82<br>(0.58, 1.15)        | 1.00                           | 0.65<br>(0.42, 1.00)        | 1.00                           | 1.32<br>(0.67, 2.62)        |
|                              | CA       | 94/52                        | 0.71<br>(0.50, 1.01)           | 0.70<br>(0.46, 1.07)        | 39/32                        | 0.79<br>(0.46, 1.36)           | 1.97<br>(1.05, 3.70)        | 0.74<br>(0.55, 0.99)           | 1.14<br>(0.42, 3.14)        | 0.61<br>(0.42, 0.88)           | 1.09<br>(0.39, 3.07)        | 1.02<br>(0.56, 1.84)           | 1.42<br>(0.42, 4.75)        |
|                              | AA       | 33/22                        | 1.03<br>(0.62, 1.73)           | 1.18<br>(0.62, 2.25)        | 7/11                         | 0.74<br>(0.26, 2.10)           | 1.26<br>(0.52, 3.05)        | 0.97<br>(0.61, 1.54)           | 1.21<br>(0.72, 2.03)        | 0.95<br>(0.54, 1.68)           | 1.12<br>(0.59, 2.14)        | 1.11<br>(0.43, 2.89)           | 1.32<br>(0.48, 3.63)        |
|                              |          |                              |                                |                             |                              |                                |                             |                                | <b>P-interaction =0.13</b>  |                                | P-interaction =0.04         |                                | P-interaction =0.92         |

\*Abbreviation: POAG: primary-open angle glaucoma; HTN: hypertension

Supplementary Table 2. Effect modification by smoking status on the associations of selected NOS3 polymorphisms and POAG

| SNP                          | Genotype | Women                         |                              |                                           | Men                           |                              |                                           | Pooled All Glaucoma          |                                           | Pooled High Tension Glaucoma |                                           | Pooled Normal Tension Glaucoma |                                           |
|------------------------------|----------|-------------------------------|------------------------------|-------------------------------------------|-------------------------------|------------------------------|-------------------------------------------|------------------------------|-------------------------------------------|------------------------------|-------------------------------------------|--------------------------------|-------------------------------------------|
|                              |          | Number of Cases (SMK+/-SMK-)† | No Smoking<br>RR<br>(95% CI) | Past or Current Smoking<br>RR<br>(95% CI) | Number of Cases (SMK+/-SMK-)† | No Smoking<br>RR<br>(95% CI) | Past or Current Smoking<br>RR<br>(95% CI) | No Smoking<br>RR<br>(95% CI) | Past or Current Smoking<br>RR<br>(95% CI) | No Smoking<br>RR<br>(95% CI) | Past or Current Smoking<br>RR<br>(95% CI) | No Smoking<br>RR<br>(95% CI)   | Past or Current Smoking<br>RR<br>(95% CI) |
| Promoter -786C/T             | TT       | 61/76                         | 1.00                         | 1.24<br>(0.79, 1.93)                      | 27/37                         | 1.00                         | 1.67<br>(0.83, 3.38)                      | 1.00                         | 1.35<br>(0.92, 1.97)                      | 1.00                         | 1.32<br>(0.77, 2.28)                      | 1.00                           | 1.42<br>(0.70, 2.90)                      |
|                              | TC       | 84/80                         | 1.30<br>(0.84, 2.00)         | 1.18<br>(0.76, 1.84)                      | 24/39                         | 0.73<br>(0.37, 0.43)         | 1.52<br>(0.78, 2.99)                      | 1.03<br>(0.60, 1.79)         | 1.27<br>(0.88, 1.84)                      | 1.10<br>(0.70, 1.74)         | 1.27<br>(0.79, 2.06)                      | 0.50<br>(0.05, 4.49)           | 1.09<br>(0.52, 2.28)                      |
|                              | CC       | 24/38                         | 1.06<br>(0.58, 1.94)         | 1.70<br>(0.98, 2.96)                      | 11/11                         | 1.30<br>(0.53, 3.23)         | 0.71<br>(0.28, 1.78)                      | 1.13<br>(0.68, 1.87)         | 1.19<br>(0.51, 2.75)                      | 1.68<br>(0.91, 3.10)         | 1.62<br>(0.68, 3.87)                      | 0.34<br>(0.11, 1.04)           | 0.70<br>(0.26, 1.86)                      |
|                              |          |                               |                              |                                           |                               |                              |                                           |                              | <b>P-interaction =0.60</b>                |                              | <b>P-interaction =0.62</b>                |                                | <b>P-interaction =0.93</b>                |
| <i>Glu298Asp</i> (rs1799983) | GG       | 83/79                         | 1.00                         | 0.90<br>(0.59, 1.36)                      | 35/35                         | 1.00                         | 1.16<br>(0.61, 2.21)                      | 1.00                         | 0.97<br>(0.68, 1.38)                      | 1.00                         | 0.78<br>(0.49, 1.23)                      | 1.00                           | 1.49<br>(0.75, 2.97)                      |
|                              | GT       | 60/82                         | 0.79<br>(0.51, 1.24)         | 1.02<br>(0.67, 1.56)                      | 17/41                         | 0.79<br>(0.38, 1.64)         | 1.78<br>(0.93, 3.39)                      | 0.79<br>(0.54, 1.16)         | 1.27<br>(0.75, 2.17)                      | 0.64<br>(0.39, 1.04)         | 1.16<br>(0.57, 2.34)                      | 1.18<br>(0.57, 2.45)           | 1.60<br>(0.77, 3.32)                      |
|                              | TT       | 26/30                         | 1.02<br>(0.55, 1.90)         | 1.70<br>(0.96, 3.04)                      | 7/ 8                          | 1.01<br>(0.37, 2.73)         | 1.20<br>(0.44, 3.26)                      | 1.01<br>(0.60, 1.72)         | 1.56<br>(0.94, 2.57)                      | 0.90<br>(0.47, 1.74)         | 1.38<br>(0.74, 2.57)                      | 1.58<br>(0.35, 7.19)           | 2.73<br>(0.98, 7.63)                      |
|                              |          |                               |                              |                                           |                               |                              |                                           |                              | <b>P-interaction =0.08</b>                |                              | <b>P-interaction =0.02</b>                |                                | <b>P-interaction =0.80</b>                |
| rs3918188                    | CC       | 78/93                         | 1.00                         | 1.16<br>(0.75, 1.79)                      | 27/39                         | 1.00                         | 1.41<br>(0.73, 2.72)                      | 1.00                         | 1.23<br>(0.86, 1.77)                      | 1.00                         | 1.16<br>(0.75, 1.80)                      | 1.00                           | 1.77<br>(0.84, 3.75)                      |
|                              | CA       | 76/80                         | 0.81<br>(0.53, 1.23)         | 0.80<br>(0.53, 1.22)                      | 22/30                         | 0.66<br>(0.33, 1.31)         | 0.97<br>(0.48, 1.97)                      | 0.77<br>(0.54, 1.09)         | 0.84<br>(0.59, 1.21)                      | 0.61<br>(0.39, 0.94)         | 0.65<br>(0.41, 1.04)                      | 1.13<br>(0.33, 3.90)           | 1.57<br>(0.69, 3.58)                      |
|                              | AA       | 18/23                         | 0.61<br>(0.32, 1.18)         | 0.82<br>(0.45, 1.51)                      | 13/19                         | 1.44<br>(0.61, 3.42)         | 2.34<br>(1.03, 5.29)                      | 0.90<br>(0.39, 2.07)         | 1.34<br>(0.48, 3.69)                      | 0.89<br>(0.30, 2.67)         | 1.05<br>(0.21, 5.30)                      | 1.08<br>(0.40, 2.95)           | 2.49<br>(0.92, 6.76)                      |
|                              |          |                               |                              |                                           |                               |                              |                                           |                              | <b>P-interaction =0.91</b>                |                              | <b>P-interaction =0.87</b>                |                                | <b>P-interaction =0.89</b>                |
| rs7830                       | CC       | 68/103                        | 1.00                         | 1.46<br>(0.96, 2.23)                      | 24/40                         | 1.00                         | 2.16<br>(1.11, 4.21)                      | 1.00                         | 1.63<br>(1.14, 2.33)                      | 1.00                         | 1.57<br>(1.02, 2.42)                      | 1.00                           | 2.72<br>(0.54, 13.76)                     |
|                              | CA       | 72/72                         | 0.91<br>(0.59, 1.41)         | 0.87<br>(0.56, 1.34)                      | 27/42                         | 1.56<br>(0.78, 3.12)         | 2.07<br>(1.08, 3.96)                      | 1.11<br>(0.67, 1.84)         | 1.30<br>(0.55, 3.03)                      | 1.05<br>(0.61, 1.79)         | 1.16<br>(0.38, 3.58)                      | 1.24<br>(0.49, 3.15)           | 1.58<br>(0.76, 3.30)                      |
|                              | AA       | 32/23                         | 1.76<br>(1.00, 3.10)         | 1.17<br>(0.62, 2.21)                      | 11/ 6                         | 1.81<br>(0.72, 4.51)         | 1.17<br>(0.39, 3.51)                      | 1.77<br>(1.09, 2.87)         | 1.17<br>(0.67, 2.03)                      | 1.91<br>(1.07, 3.40)         | 1.06<br>(0.53, 2.14)                      | 1.42<br>(0.52, 3.92)           | 1.36<br>(0.49, 3.83)                      |
|                              |          |                               |                              |                                           |                               |                              |                                           |                              | <b>P-interaction =0.004</b>               |                              | <b>P-interaction =0.007</b>               |                                | <b>P-interaction =0.37</b>                |

\*Abbreviation: POAG: primary-open angle glaucoma; SMK: cigarette smoking

Supplementary Table 3. Effect modification by alcohol intake on the associations of selected NOS3 polymorphisms and POAG

| SNP                          | Genotype | Women                        |                               |                                | Men                          |                               |                                | Pooled All Glaucoma           |                                | Pooled High Tension Glaucoma  |                                | Pooled Normal Tension Glaucoma |                                |
|------------------------------|----------|------------------------------|-------------------------------|--------------------------------|------------------------------|-------------------------------|--------------------------------|-------------------------------|--------------------------------|-------------------------------|--------------------------------|--------------------------------|--------------------------------|
|                              |          | Number of Cases (ALC+/ALC-)† | No Drinking<br>RR<br>(95% CI) | Any Drinking<br>RR<br>(95% CI) | Number of Cases (ALC+/ALC-)† | No Drinking<br>RR<br>(95% CI) | Any Drinking<br>RR<br>(95% CI) | No Drinking<br>RR<br>(95% CI) | Any Drinking<br>RR<br>(95% CI) | No Drinking<br>RR<br>(95% CI) | Any Drinking<br>RR<br>(95% CI) | No Drinking<br>RR<br>(95% CI)  | Any Drinking<br>RR<br>(95% CI) |
| Promoter -786C/T             | TT       | 32/105                       | 1.00                          | 0.85<br>(0.51, 1.42)           | 12/53                        | 1.00                          | 0.72<br>(0.31, 1.70)           | 1.00                          | 0.82<br>(0.53, 1.26)           | 1.00                          | 0.85<br>(0.50, 1.47)           | 1.00                           | 0.58<br>(0.23, 1.49)           |
|                              | TC       | 35/131                       | 0.98<br>(0.53, 1.80)          | 1.00<br>(0.60, 1.65)           | 11/55                        | 0.99<br>(0.34, 2.94)          | 0.67<br>(0.29, 1.54)           | 0.98<br>(0.57, 1.67)          | 0.90<br>(0.58, 1.38)           | 0.99<br>(0.51, 1.93)          | 0.97<br>(0.57, 1.66)           | 0.59<br>(0.19, 1.86)           | 0.38<br>(0.06, 2.42)           |
|                              | CC       | 13/49                        | 1.36<br>(0.59, 3.12)          | 0.99<br>(0.56, 1.74)           | 3/19                         | 0.43<br>(0.09, 2.04)          | 0.56<br>(0.21, 1.53)           | 0.93<br>(0.32, 2.69)          | 0.86<br>(0.53, 1.41)           | 0.98<br>(0.38, 2.52)          | 1.44<br>(0.79, 2.64)           | 0.58<br>(0.03, 12.53)          | 0.17<br>(0.05, 0.52)           |
|                              |          |                              |                               |                                |                              |                               |                                | <b>P-interaction =0.86</b>    |                                |                               | P-interaction =0.30            |                                | P-interaction =0.68            |
| <i>Glu298Asp</i> (rs1799983) | GG       | 36/128                       | 1.00                          | 0.87<br>(0.53, 1.41)           | 11/61                        | 1.00                          | 0.97<br>(0.41, 2.30)           | 1.00                          | 0.89<br>(0.58, 1.36)           | 1.00                          | 0.85<br>(0.50, 1.44)           | 1.00                           | 0.95<br>(0.41, 2.22)           |
|                              | GT       | 35/108                       | 1.00<br>(0.55, 1.82)          | 0.88<br>(0.54, 1.44)           | 12/48                        | 1.86<br>(0.62, 5.61)          | 1.04<br>(0.44, 2.50)           | 1.15<br>(0.68, 1.95)          | 0.92<br>(0.60, 1.41)           | 0.85<br>(0.43, 1.67)          | 0.94<br>(0.55, 1.62)           | 2.32<br>(0.85, 6.32)           | 0.87<br>(0.37, 2.06)           |
|                              | TT       | 9/47                         | 0.96<br>(0.38, 2.46)          | 1.42<br>(0.79, 2.54)           | 3/12                         | 1.51<br>(0.27, 8.44)          | 0.90<br>(0.31, 2.64)           | 1.07<br>(0.47, 2.43)          | 1.28<br>(0.76, 2.13)           | 0.91<br>(0.33, 2.50)          | 1.27<br>(0.67, 2.40)           | 1.56<br>(0.25, 9.79)           | 1.59<br>(0.55, 4.58)           |
|                              |          |                              |                               |                                |                              |                               |                                | <b>P-interaction =0.08</b>    |                                |                               | P-interaction =0.40            |                                | P-interaction =0.38            |
| rs3918188                    | CC       | 38/135                       | 1.00                          | 0.93<br>(0.57, 1.53)           | 12/57                        | 1.00                          | 0.77<br>(0.33, 1.82)           | 1.00                          | 0.89<br>(0.58, 1.36)           | 1.00                          | 1.43<br>(0.83, 2.46)           | 1.00                           | 0.24<br>(0.10, 0.58)           |
|                              | CA       | 36/121                       | 0.75<br>(0.41, 1.38)          | 0.74<br>(0.45, 1.19)           | 12/41                        | 0.94<br>(0.32, 2.76)          | 0.46<br>(0.20, 1.08)           | 0.79<br>(0.47, 1.35)          | 0.66<br>(0.43, 1.00)           | 0.99<br>(0.50, 1.95)          | 0.77<br>(0.45, 1.32)           | 0.38<br>(0.13, 1.10)           | 0.26<br>(0.04, 1.77)           |
|                              | AA       | 8/33                         | 0.70<br>(0.27, 1.82)          | 0.62<br>(0.34, 1.13)           | 2/30                         | 0.41<br>(0.07, 2.53)          | 1.47<br>(0.58, 3.73)           | 0.62<br>(0.27, 1.45)          | 0.88<br>(0.38, 2.04)           | 0.73<br>(0.25, 2.17)          | 1.15<br>(0.26, 5.03)           | 0.35<br>(0.06, 2.09)           | 0.41<br>(0.15, 1.09)           |
|                              |          |                              |                               |                                |                              |                               |                                | <b>P-interaction =0.91</b>    |                                |                               | P-interaction =0.77            |                                | P-interaction =0.03            |
| rs7830                       | CC       | 31/141                       | 1.00                          | 1.16<br>(0.70, 1.91)           | 10/55                        | 1.00                          | 0.85<br>(0.37, 1.98)           | 1.00                          | 1.07<br>(0.70, 1.64)           | 1.00                          | 1.04<br>(0.63, 1.73)           | 1.00                           | 1.80<br>(0.64, 5.06)           |
|                              | CA       | 38/108                       | 1.11<br>(0.60, 2.04)          | 0.81<br>(0.49, 1.35)           | 13/58                        | 2.20<br>(0.71, 6.88)          | 0.91<br>(0.39, 2.12)           | 1.31<br>(0.73, 2.35)          | 0.84<br>(0.54, 1.29)           | 0.94<br>(0.39, 2.27)          | 0.83<br>(0.49, 1.39)           | 4.68<br>(1.41, 15.48)          | 1.20<br>(0.43, 3.36)           |
|                              | AA       | 14/41                        | 1.33<br>(0.57, 3.08)          | 1.31<br>(0.71, 2.40)           | 3/15                         | 0.47<br>(0.10, 2.30)          | 1.00<br>(0.37, 2.73)           | 0.99<br>(0.40, 2.48)          | 1.22<br>(0.72, 2.05)           | 0.91<br>(0.37, 2.25)          | 1.32<br>(0.71, 2.46)           | 3.53<br>(0.62, 19.95)          | 1.22<br>(0.38, 3.96)           |
|                              |          |                              |                               |                                |                              |                               |                                | <b>P-interaction =0.62</b>    |                                |                               | P-interaction =0.72            |                                | P-interaction =0.06            |

\*Abbreviation: POAG: primary-open angle glaucoma; ALC: alcohol
